# Supplementary material
Source: PubMed Central journal article supplement (PMC5559197)

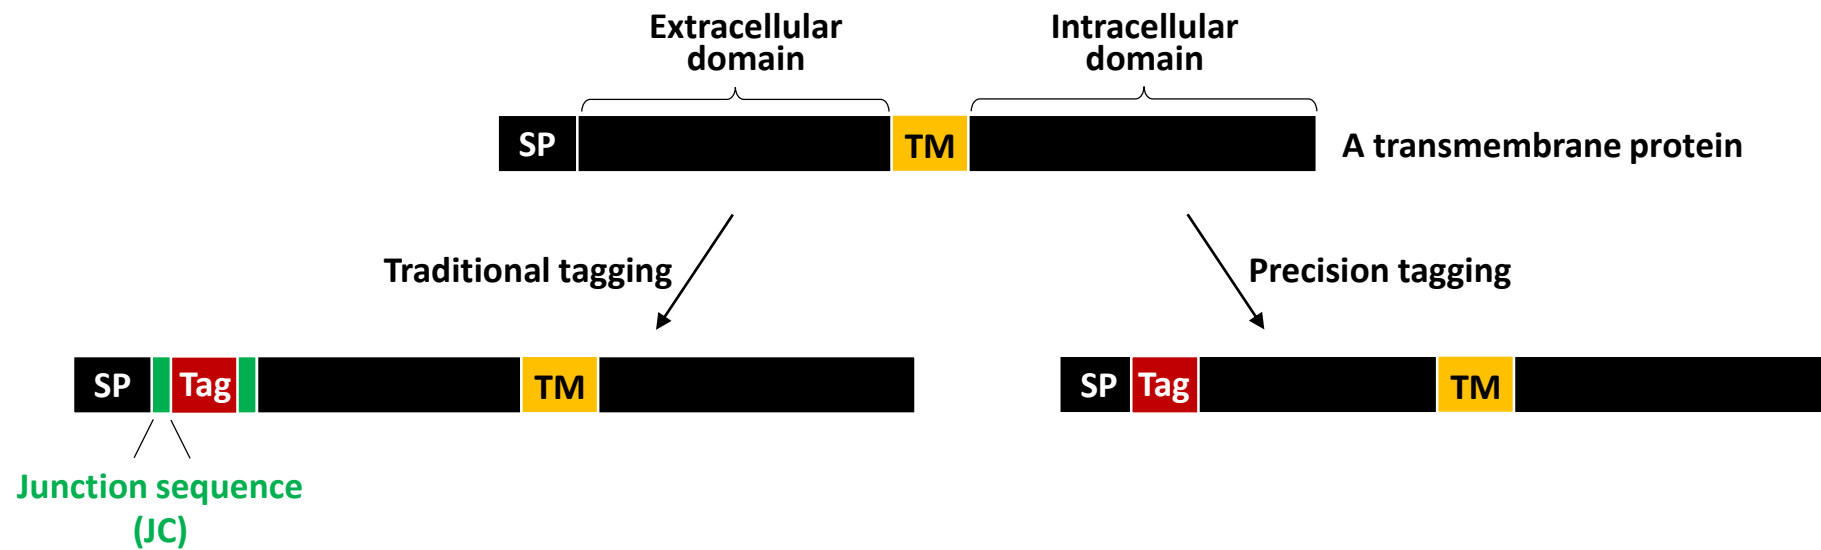

Figure 1. A scarless clone generated by precision tagging

Supplement: NIHMS882005-supplement-1.pdf [file NIHMS882005-supplement-1.pdf]

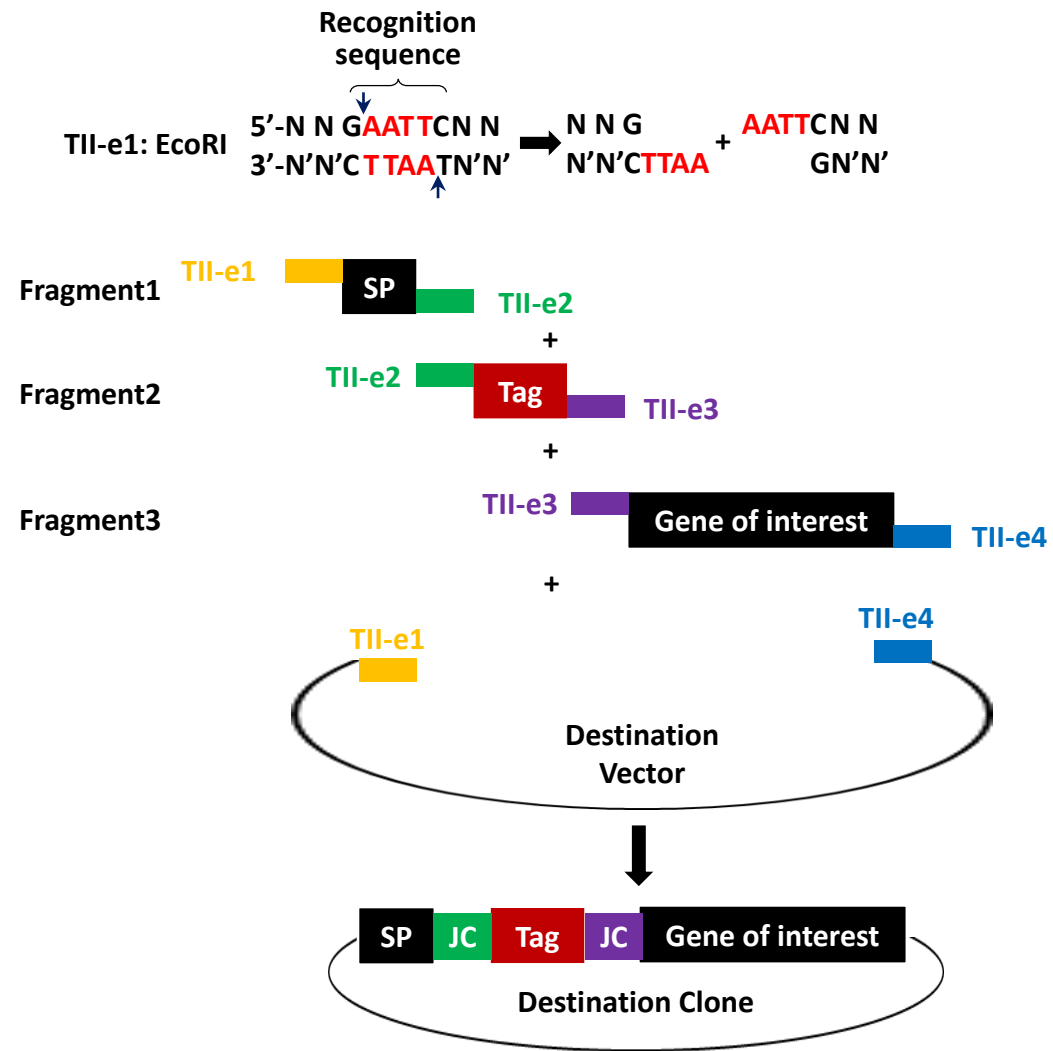

Supplementary Figure 1: Traditional protein tagging strategy

Supplement: NIHMS882005-supplement-2.pdf [file NIHMS882005-supplement-2.pdf]
